# Supplementary material
Source: PubMed Central journal article supplement (PMC5927632)
Supplement: ja7b07505_si_001.pdf [file ja7b07505_si_001.pdf]

## SUPPLEMENTARY INFORMATION

A combination of C $\alpha$ -H hydrogen bonds and van der Waals packing  
modulates the stability of GxxxG-mediated dimers in membranes

Samantha M. Anderson<sup>‡</sup>, Benjamin K. Mueller<sup>‡</sup>, Evan J. Lange, Alessandro Senes\*

Department of Biochemistry  
University of Wisconsin-Madison  
433 Babcock Dr.  
Madison WI 53706

<sup>‡</sup>These authors contributed equally

\*Corresponding author:  
phone +1-608-890-2584  
senes@wisc.edu

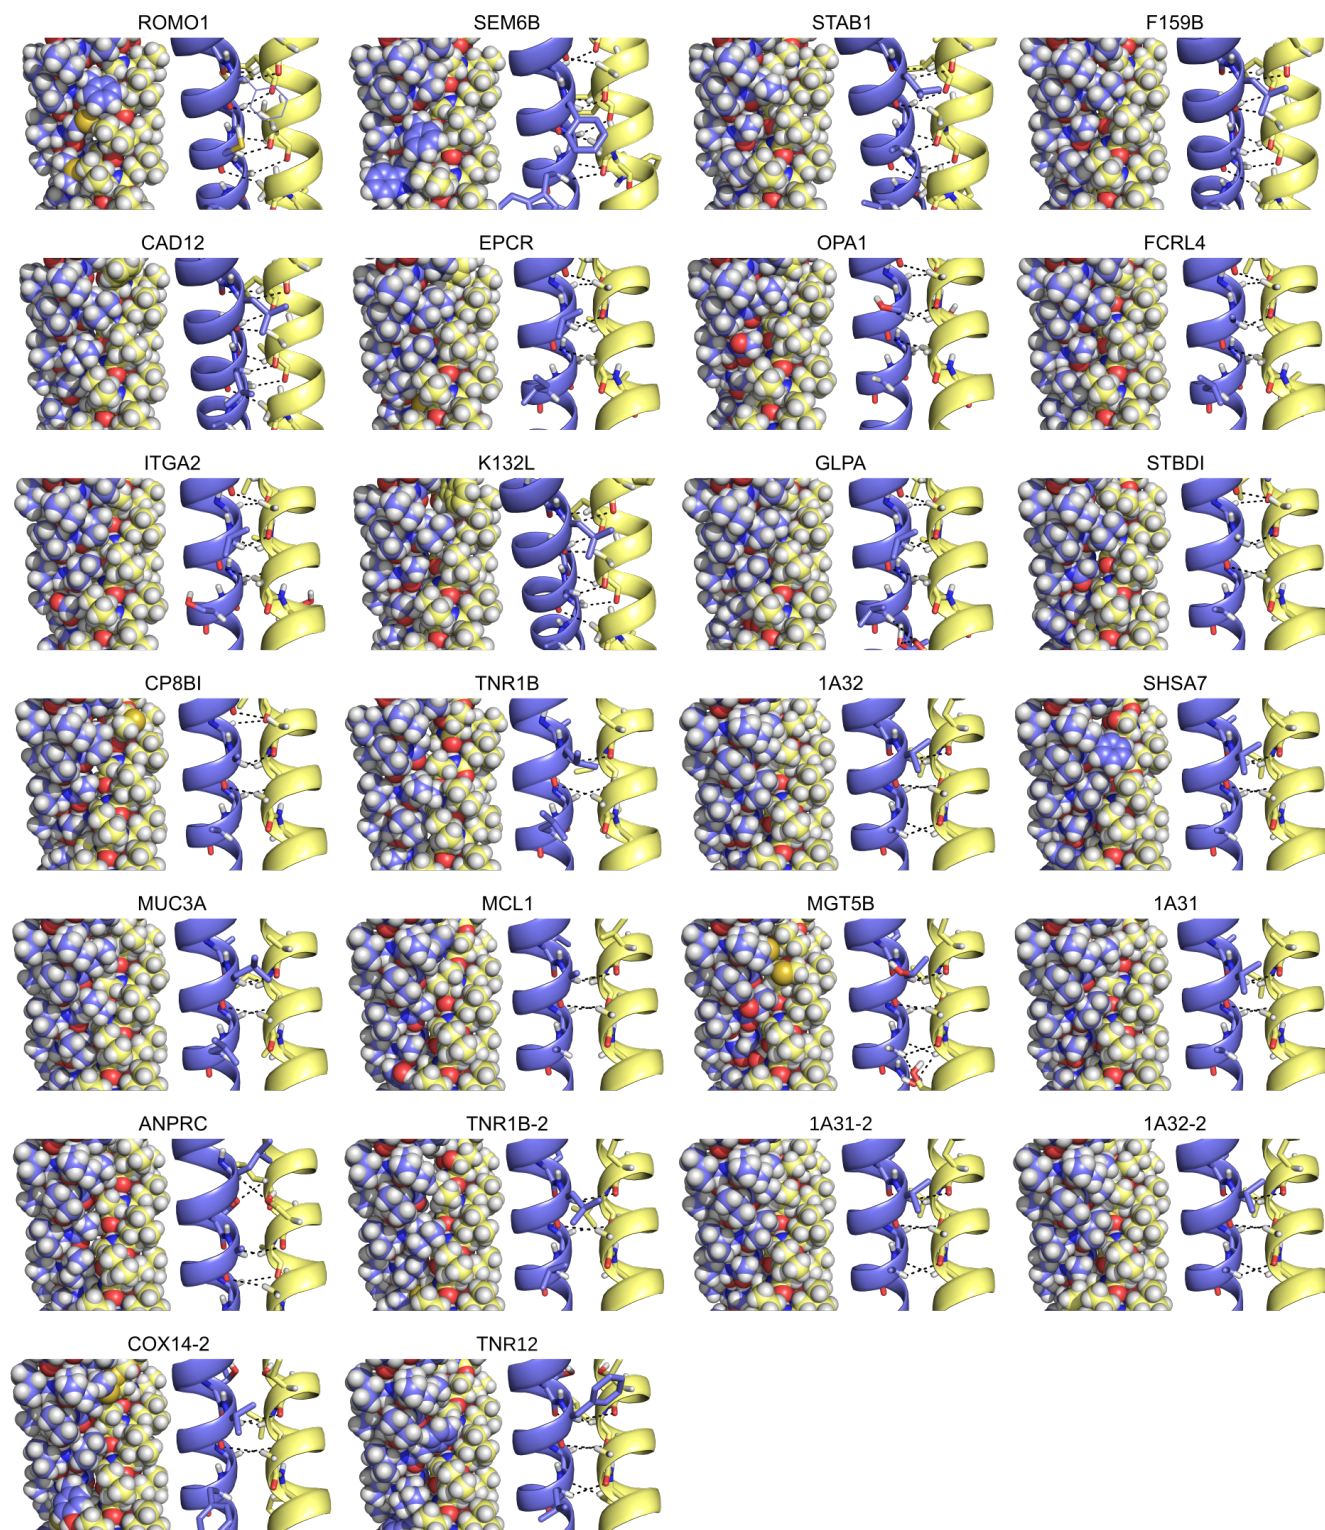

**Figure S1. Structural models of the 26 final experimental constructs.** The constructs are sorted left to right by CATM energy score. For each construct, a space filling representation is shown on the left to illustrate the packing, and a cartoon representation is shown on the right to illustrate the C $\alpha$ -H hydrogen bond network.

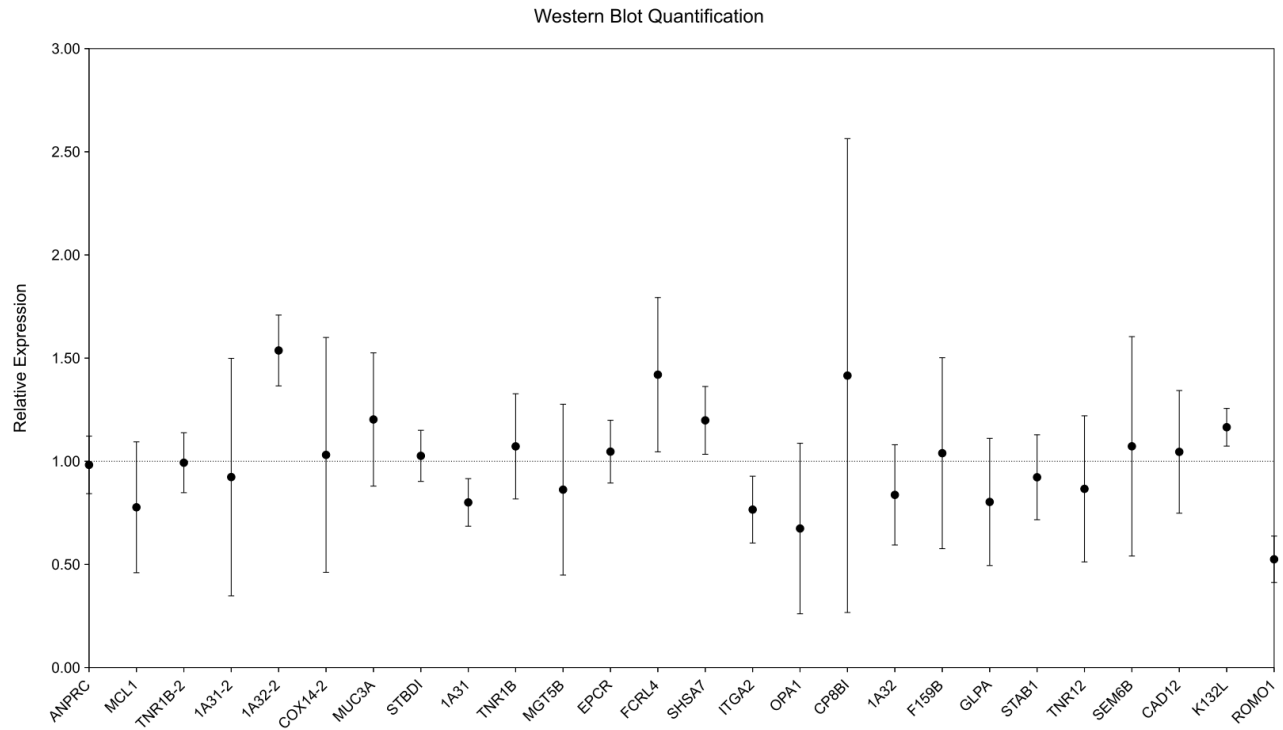

**Figure S2. Quantification of expression of the TOXCAT construct using immunoblotting.** Normalized expression. The individual construct expression range is 0.52-1.54 fold of the average expression (dashed line) with a standard deviation of the relative expression of the 26 samples of 0.22. The error bars represent the standard deviation of four biological replicates of each construct.

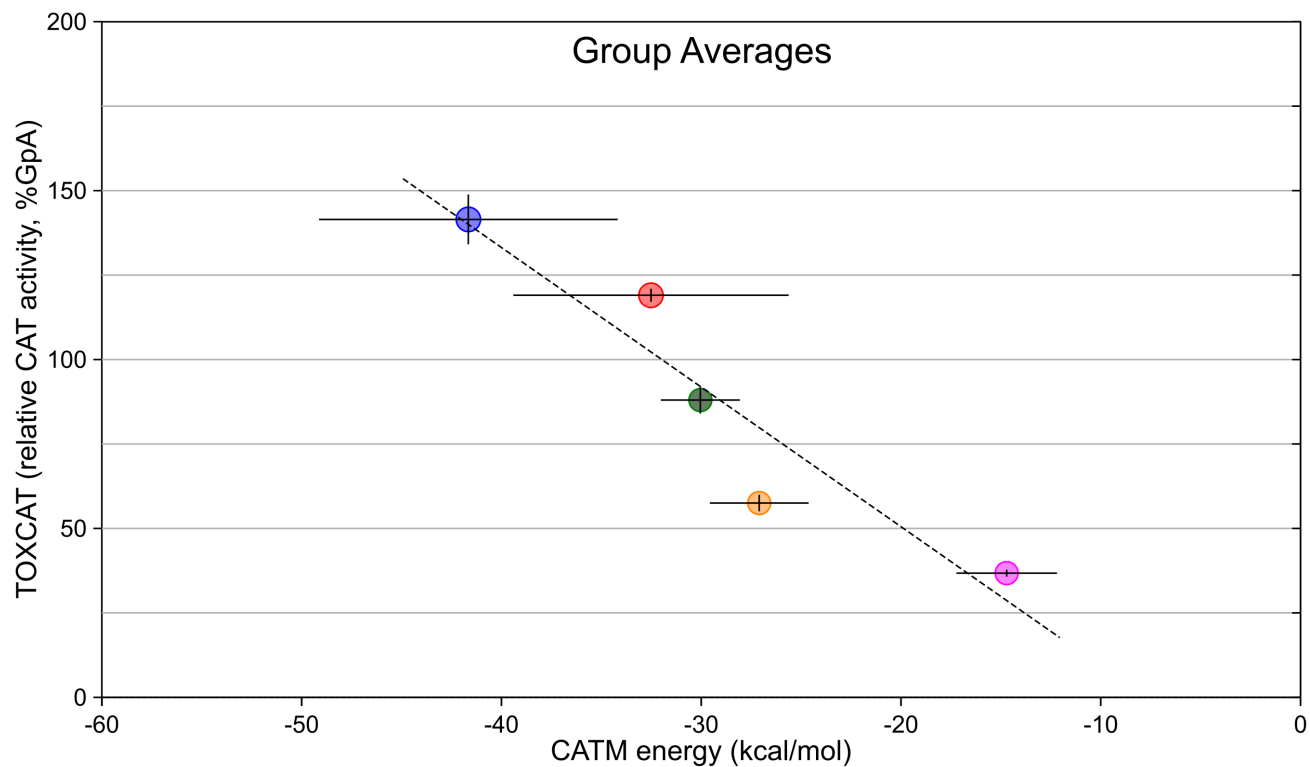

**Figure S3. Group averages containing the TNR12 outlier.** Same data as in Fig. 4a, with the inclusion the outlier point included in the >100% group. Each point corresponds to the group averaged of five bins based on CAT activity from weak (>25%, magenta) to very strong (>125%, blue), in 25% intervals. The error bars represent the standard error of the average. The dashed line is the linear regression of the data ( $R^2 = 0.883$ ,  $p < 0.05$ ).

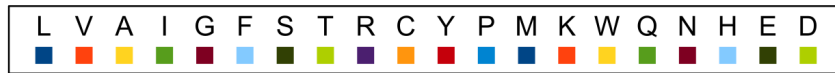

**a** All human single pass TM sequences

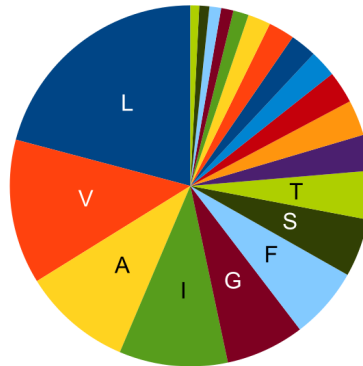

**b** Set of 604 predicted GAS<sub>right</sub> dimers

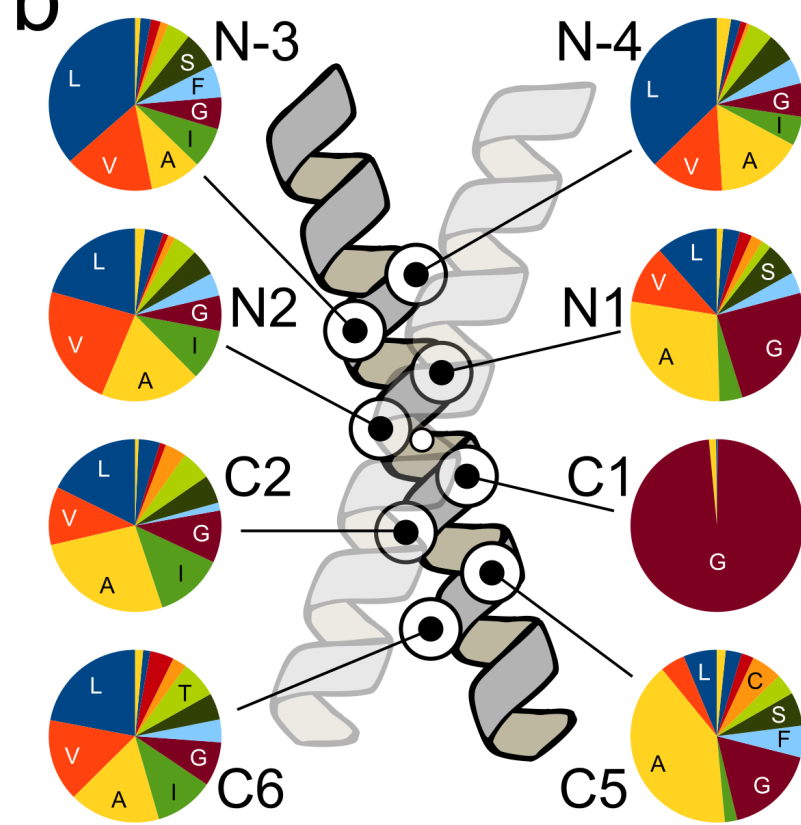

**Figure S4. Composition of the interfacial positions of the 604 predicted GAS<sub>right</sub> dimers.** a) For reference, overall composition of all single pass human TM domains. b) Composition of the interfacial position of the final 604 predicted GAS<sub>right</sub> sequences. These sequences exclude any sequence that contained polar amino acids or proline residues at the eight interfacial positions. The observed biases are consistent with those expected for GAS<sub>right</sub> motifs, with Gly almost invariably present at position C1, and small amino acids frequently present at positions N1 and C5.

Table S1. Final set of TOXCAT constructs and their C1 mutants

| Uniprot AC <sup>1</sup> | Name               | Wild-type Sequence                    | Poly-Leu Construct            | TOXCAT <sup>2</sup> | CATM (kcal/mol) <sup>3</sup> |
|-------------------------|--------------------|---------------------------------------|-------------------------------|---------------------|------------------------------|
| P60602                  | ROMO1 <sup>4</sup> | VKMGFVVMGCAVGM AAGALF GTF SCLRIGM     | RASLLLGFLLGCLLGMLL GALILIL    | 155%±28%            | -56.3±0.1                    |
| P60602                  | ROMO1-G12I         |                                       | RASLLLGFLLGCLLIMLL GALILIL    | 80%±42%             | -24.3±0.1                    |
| A8MWY0                  | K132L              | WLKVGAGVGAFTAVLLVALTCYFWKKN           | RASLLWLWLLGALLGALLAVLILIL     | 139%±19%            | -31.8±0.3                    |
| A8MWY0                  | K132L_G12I         |                                       | RASLLWLWLLGALLIALLAVLILIL     | 22%±10%             | N.M.                         |
| P55289                  | CAD12              | FLAVGLSTGALIAILLCCIVILLAIIVVLYVALRRQ  | RASLLLFLLLGLLLGALLAILILIL     | 130%±12%            | -36.9±0.5                    |
| P55289                  | CAD12_G12I         |                                       | RASLLLFLLLGLLLIALLAILILIL     | 34%±9%              | N.M.                         |
| P02724                  | GLPA <sup>4</sup>  | EAEITLIIFGV MAGVIGTILLISYGIRRL        | RASLLLILLGVLLGVLLTILILIL      | 124%±46%            | -31.3±0.3                    |
| P02724                  | GLPA_G12I          |                                       | RASLLLILLGVLLIVLLTILILIL      | 32%±4%              | N.M.                         |
| Q9H3T3                  | SEM6B              | TSSVAAFVVGAVVSGFSVGFVGLRER            | RASLLAVLLGFLLGWLLGLLILIL      | 122%±10%            | -44.5±0.3                    |
| Q9H3T3                  | SEM6B_G12I         |                                       | RASLLAVLLGFLLIWLGLLILIL       | 27%±5%              | N.M.                         |
| Q9NY15                  | STAB1              | VAAGVGAFLAAGALLGLVAGALYLRAR           | RASLLVLLLGALLGLL GALILIL      | 119%±18%            | -40.6±0.0                    |
| Q9NY15                  | STAB1_G12I         |                                       | RASLLVLLLGALLLILL GALILIL     | 22%±4%              | N.M.                         |
| Q9NP84                  | TNR12              | LWAILGGALSLTFVLGLLSGFLVWRRRC          | RASLLALLLTFLLGLLGLFLILIL      | 119%±14%            | -6.3±1.4                     |
| Q9NP84                  | TNR12_G12I         |                                       | RASLLALLLTFLLLILLGLFLILIL     | 29%±5%              | N.M.                         |
| A6NKW6                  | F159B <sup>4</sup> | SLSIGALIGLGI AALVLLAFVISVCVL          | RASLLSLLL GALLGLL AALILIL     | 112%±20%            | -39.9±0.0                    |
| A6NKW6                  | F159B_G12I         |                                       | RASLLSLLL GALLLIL AALILIL     | 32%±7%              | -5.2±0.9                     |
| Q9UNU6                  | CP8B1              | MVLWGAFLGALLVVIAGYLCLAGM              | RASLLMVLLGALLGALLVVLILIL      | 95%±15%             | -28.7±0.3                    |
| Q9UNU6                  | CP8B1_G12I         |                                       | RASLLMVLLGALLIALLVVLILIL      | 27%±6%              | N.M.                         |
| P10314                  | 1A32               | IAIVGIIAGLVLF GAVFAGAVVA AVRWRRK      | RASLLVLLL AMLL GALL AALILIL   | 94%±16%             | -25.1±0.2                    |
| P10314                  | 1A32_G12I          |                                       | RASLLVLLL AMLL IALL AALILIL   | 20%±5%              | N.M.                         |
| O60313                  | OPA1               | ATRLKLRYLILGS AVGGGYTAK               | RASLLYL LLSGLL GLLTALILIL     | 85%±20%             | -34.0±0.1                    |
| O60313                  | OPA1_G12I          |                                       | RASLLYL LLSGLL IGLL TAILILIL  | 21%±3%              | -15.0±0.6                    |
| P17301                  | ITA2               | VATGVIIGSIIAG ILLLLALVAILWKL G        | RASLLLVLLGVLLGSLLAGLILIL      | 78%±8%              | -32.3±0.1                    |
| P17301                  | ITA2_G12I          |                                       | RASLLLVLLGVLLISL LAGLILIL     | 22%±4%              | N.M.                         |
| A6NL88                  | SHSA7              | STAYVCGVISFALAVGVGAKVAFSKA            | RASLLSFL LLA VLLGALLAFILILIL  | 68%±13%             | -23.2±0.4                    |
| A6NL88                  | SHSA7_G12I         |                                       | RASLLSFL LLA VLLIALLAFILILIL  | 17%±4%              | N.M.                         |
| Q9UNN8                  | EPCR               | YTSVLGVLVGSGFIIAGVAVGIFLCTG           | RASLLLFILLGVLLGILLCTLILIL     | 61%±11%             | -36.7±0.2                    |
| Q9UNN8                  | EPCR_G12I          |                                       | RASLLLFILLGVLLIILLCTLILIL     | 12%±8%              | N.M.                         |
| Q96PJ5                  | FCRL4              | DGLVAAGATGGLLSALLLAVALLFICW           | RASLLLVLLGALLGLL LALLILIL     | 61%±12%             | -33.0±0.1                    |
| Q96PJ5                  | FCRL4_G12I         |                                       | RASLLLVLLGALLLIL LALLILIL     | 25%±5%              | N.M.                         |
| Q3V5L5                  | MGT5B              | FRLFVLGIGFFTL CFLMTSLGGQFSAR          | RASLLLCLLMTLLGGLLSALILIL      | 58%±12%             | -19.9±0.4                    |
| Q3V5L5                  | MGT5B_G12I         |                                       | RASLLLCLLMTLLIGLLSALILIL      | 29%±6%              | -10.8±0.1                    |
| P16189                  | 1A31               | IAIVGIIAGLVLF GAVFAGAVVA AVRWRRK      | RASLLVLLL AVLLGALLAALILIL     | 52%±12%             | -19.5±0.1                    |
| P16189                  | 1A31_G12I          |                                       | RASLLVLLL AVLLIALLAALILIL     | 25%±6%              | N.M.                         |
| P20333                  | TNR1B              | TGDFALAVGLIVGVTALGLLIIGVNV CVIMTQVKKK | RASLLTGL LALLLGLLGLVLILIL     | 51%±5%              | -28.4±0.2                    |
| P20333                  | TNR1B_G12I         |                                       | RASLLTGL LALLLILLGLVLILIL     | 18%±8%              | N.M.                         |
| O95210                  | STBD1              | VWSALLVGGGLAGALFVWLLRGG               | RASLLLLL LLLGGLL GALLVWLILIL  | 51%±9%              | -28.9±0.0                    |
| O95210                  | STBD1_G12I         |                                       | RASLLLLL LLLGGLL IALLVWLILIL  | 21%±4%              | N.M.                         |
| Q02505                  | MUC3A              | WRALVGGLTAG AALLVLLL LALGVRAV         | RASLLLLL LLLALLL GLLL GALILIL | 40%±10%             | -22.8±1.1                    |
| Q02505                  | MUC3A_G12I         |                                       | RASLLLLL LLLALLL ILLL GALILIL | 16%±5%              | N.M.                         |
| P10314                  | 1A32-2             | IAIVGIIAGLVLF GAVFAGAVVA AVRWRRK      | RASLLIIL LLLVLLGALLFALILIL    | 39%±4%              | -8.2±0.4                     |
| P10314                  | 1A32-2_G12I        |                                       | RASLLIIL LLLVLLIALLFALILIL    | 4%±9%               | N.M.                         |
| Q96I36                  | COX14-2            | YKTFSTSMMLLTVYGGYLC SVRVYHYFQW        | RASLLMML LTVLLGYLLSCLILIL     | 39%±4%              | -7.9±0.1                     |
| Q96I36                  | COX14-2_G12I       |                                       | RASLLMML LTVLLIYLLSCLILIL     | 28%±2%              | N.M.                         |
| P16189                  | 1A31-2             | IAIVGIIAGLVLF GAVFAGAVVA AVRWRRK      | RASLLIIL LLLVLLGALLAGLILIL    | 36%±10%             | -10.7±0.0                    |
| P16189                  | 1A31-2_G12I        |                                       | RASLLIIL LLLVLLIALLAGLILIL    | 19%±13%             | N.M.                         |
| P20333                  | TNR1B-2            | TGDFALAVGLIVGVTALGLLIIGVNV CVIMTQVKKK | RASLLTALL LLLGLLGLVLLCVLILIL  | 35%±12%             | -11.3±0.1                    |
| P20333                  | TNR1B-2_G12I       |                                       | RASLLTALL LLLGLLIVLLCVLILIL   | 15%±2%              | N.M.                         |
| Q07820                  | MCL1               | EGGIRNVLLAFAGVAGVAGLAYLIR             | RASLLAFLLVALLGALLAYLILIL      | 35%±8%              | -22.6±0.1                    |
| Q07820                  | MCL1-G12I          |                                       | RASLLAFLLVALLIALLAYLILIL      | 19%±4%              | N.M.                         |
| P17342                  | ANPRC              | LEESAVTGI VVGALLGAGLLMAFYFRKK         | RASLLLLL LLSALLGILLGALILIL    | 34%±4%              | -19.4±0.1                    |
| P17342                  | ANPRC-G12I         |                                       | RASLLLLL LLSALLIILLGALILIL    | 24%±1%              | N.M.                         |

1) Uniprot Accession

2) Relative CAT activity compared to GpA (average ± standard deviation)

3) CATM energy of the poly-Leu construct (average ± standard deviation). N.M. = no model predicted.

4) Constructs with C1 values >30% but at least a 75% reduction

Table S2. Constructs removed because of growth defect on maltose media

| Uniprot AC <sup>1</sup> | Name        | Wild-type Sequence                 | Poly-Leu Construct        | TOXCAT <sup>2</sup> | CATM (kcal/mol) <sup>3</sup> |
|-------------------------|-------------|------------------------------------|---------------------------|---------------------|------------------------------|
| Q15116                  | PDCD1       | TLVVGVVGGLLGSLVLLVWVLAVICSR        | RASLLLTLVLLGVLGLLSLLILI   | 215%±5%             | -35.6±0.6                    |
| Q15116                  | PDCD1_G12I  |                                    | RASLLLTLVLLGVLVLLSLLILI   | 44%±10%             | N.M.                         |
| Q96LC7                  | SIG10       | FSNGAFLGIGITALLFLCLALIIIMKIL       | RASLLLFLLGALLGILLTALILI   | 214%±10%            | -38.9±0.9                    |
| Q96LC7                  | SIG10_G12I  |                                    | RASLLLFLLGALLIILLTALILI   | 36%±2%              | N.M.                         |
| Q15904                  | VAS1        | DCASFFSAGIWMGLLTSLFMLFIFTYG        | RASLLFFLLGILLGILLSLLILI   | 165%±19%            | -44.5±0.8                    |
| Q15904                  | VAS1-G12I   |                                    | RASLLFFLLGILLIILLSLLILI   | 20%±9%              | N.M.                         |
| Q96D42                  | HAVCR1      | TKGIYAGVCISVLVLLALLGVIIAKKY        | RASLLLVLVLLGILLGVLLSVLILI | 160%±5%             | -37.5±0.9                    |
| Q96D42                  | HAVCR1_G12I |                                    | RASLLLVLVLLGILLIVLLSVLILI | 20%±5%              | N.M.                         |
| Q6P7N7                  | TMM81       | VASALGIGIAIGVVGVLVRLVLCALR         | RASLLLALLGILLGVLLGVLILI   | 145%±6%             | -44.8±0.7                    |
| Q6P7N7                  | TMM81_G12I  |                                    | RASLLLALLGILLIVLLGVLILI   | 29%±2%              | N.M.                         |
| Q8NCU8                  | YB039       | ERTLQLSVLVAFASGVLLGWQAN            | RASLLSVLLAFLLGVLLGWLILI   | 135%±45%            | -23.2±0.5                    |
| Q8NCU8                  | YB039_G12I  |                                    | RASLLSVLLAFLLIVLLGWLILI   | -2%±1%              | N.M.                         |
| Q9Y6N1                  | COX11       | KTTLTYYVAAVVGMGLGASAAVALY          | RASLLTYLLAVLLGMLLASLILI   | 128%±9%             | -33.3±0.3                    |
| Q9Y6N1                  | COX11_G12I  |                                    | RASLLTYLLAVLLIMLLASLILI   | 25%±5%              | N.M.                         |
| P13591                  | NCAM1       | TSGLSTGAIVGILIVIFVLLLVVVDIT        | RASLLLVLVLLGILLGALLGILILI | 127%±1%             | -32.8±0.6                    |
| P13591                  | NCAM1-G12I  |                                    | RASLLLVLVLLGILLIALGILILI  | 34%±2%              | N.M.                         |
| O75354                  | ENTP6       | SLRVAKVAYALGLCVGVFIYVAYIKWH        | RASLLVALLAYLLGLLGVLILI    | 106%±7%             | -25.3±0.1                    |
| O75354                  | ENTP6-G12I  |                                    | RASLLVALLAYLLIILLGVLILI   | 73%±2%              | N.M.                         |
| Q9NVM1                  | EVA1B       | ESFGLYFVLGVCFGLLLTLCLLVISIS        | RASLLLYFLLGVLLGLLTLILI    | 105%±10%            | -38.0±0.5                    |
| Q9NVM1                  | EVA1B_G12I  |                                    | RASLLLYFLLGVLLIILLTLILI   | 26%±6%              | N.M.                         |
| Q86X52                  | CHSS1       | GRRAWLSVLLGLVLFVLLASRLVLARA        | RASLLSVLLGLLGFLLASLILI    | 93%±7%              | -35.8±0.1                    |
| Q86X52                  | CHSS1-G12I  |                                    | RASLLSVLLGLLIFLLASLILI    | 17%±5%              | N.M.                         |
| Q9UKU0                  | ACSL6       | FRSLSATTLVSMGALAAIILAYWFTHRA       | RASLLSALLVLLGALLAILILI    | 59%±17%             | -13.3±0.1                    |
| Q9UKU0                  | ACSL6-G12I  |                                    | RASLLSALLVLLIALAILILI     | 24%±4%              | N.M.                         |
| Q93038                  | TNR25       | WRQMFVQVLLAGLVVALLLGATLTYT         | RASLLFWLLVLLGLLLALLILI    | 56%±9%              | -17.5±0.3                    |
| Q93038                  | TNR25_G12I  |                                    | RASLLFWLLVLLIILLALLILI    | 56%±8%              | N.M.                         |
| P05026                  | AT1B1       | WFKILLFYVIFYGCLAGIFIGTIQVMLLTISEFK | RASLLVILLGCLLGILLGTLILI   | 39%±3%              | -33.7±0.3                    |
| P05026                  | AT1B1_G12I  |                                    | RASLLVILLGCLLIILLGTLILI   | 24%±8%              | N.M.                         |
| Q8N6P7                  | I22R1       | TWTYSFSGAFLFSMGFLVAVLCYLSYR        | RASLLLTLLYSLLGALLFSLILI   | 31%±9%              | -21.9±0.1                    |
| Q8N6P7                  | I22R1_G12I  |                                    | RASLLLTLLYSLLIALFSLILI    | 39%±11%             | N.M.                         |

1) Uniprot Accession

2) Relative CAT activity compared to GpA (average ± standard deviation)

3) CATM energy of the poly-Leu construct (average ± standard deviation). N.M. = no model predicted.

Table S3. Constructs removed because the TOXCAT signal of the WT sequence was <30%

| Uniprot AC <sup>1</sup> | Name        | Wild-type Sequence                                                                                                                                                   | Poly-Leu Construct                                                                                                    | TOXCAT <sup>2</sup> | CATM (kcal/mol) <sup>3</sup> |
|-------------------------|-------------|----------------------------------------------------------------------------------------------------------------------------------------------------------------------|-----------------------------------------------------------------------------------------------------------------------|---------------------|------------------------------|
| Q6UXN7                  | TO201       | LLRLLAA <b>AA</b> ACGAF <b>A</b> FLGYCIYLN <b>R</b> K                                                                                                                | RASLLLLLLLL <b>A</b> ALLGALL <b>F</b> LLLIL <b>I</b>                                                                  | 28%±4%              | -26.6±1.3                    |
| Q6UXN7                  | TO20L_G12I  |                                                                                                                                                                      | RASLLLLLLLL <b>A</b> ALL <b>I</b> ALL <b>F</b> LLLIL <b>I</b>                                                         | 29%±2%              | N.M.                         |
| Q8TEM1                  | PO210       | SYQVM <b>F</b> TL <b>F</b> ALL <b>A</b> GTAV <b>M</b> IAYHT <b>V</b> C                                                                                               | RASLL <b>L</b> F <b>T</b> LL <b>A</b> LL <b>L</b> GT <b>L</b> LM <b>I</b> L <b>I</b> L <b>I</b>                       | 28%±5%              | -25.7±0.2                    |
| Q8TEM1                  | PO210_G12I  |                                                                                                                                                                      | RASLL <b>L</b> F <b>T</b> LL <b>A</b> LL <b>L</b> L <b>L</b> LM <b>I</b> L <b>I</b> L <b>I</b>                        | 40%±11%             | N.M.                         |
| Q9BRQ8                  | AIFM2       | QVSVESGALHV <b>V</b> IVGG <b>F</b> GG <b>I</b> AA <b>S</b> Q <b>L</b>                                                                                                | RASLLLVILLG <b>G</b> LL <b>I</b> LL <b>A</b> SL <b>I</b> L <b>I</b>                                                   | 26%±8%              | -29.0±0.1                    |
| Q9BRQ8                  | AIFM2_G12I  |                                                                                                                                                                      | RASLLLVILLG <b>G</b> LL <b>I</b> LL <b>A</b> SL <b>I</b> L <b>I</b>                                                   | 22%±10%             | N.M.                         |
| Q8IVU1                  | IGDCC3      | TT <b>G</b> IV <b>I</b> G <b>I</b> H <b>I</b> G <b>V</b> TC <b>I</b> IFCVL <b>F</b> LL <b>F</b> G <b>Q</b> R                                                         | RASLLLLLLLL <b>G</b> ILL <b>G</b> ILL <b>G</b> V <b>L</b> L <b>I</b> L <b>I</b>                                       | 25%±6%              | -41.1±0.5                    |
| Q8IVU1                  | IGDCC3_G12I |                                                                                                                                                                      | RASLLLLLLLL <b>G</b> ILL <b>I</b> LL <b>G</b> V <b>L</b> L <b>I</b> L <b>I</b>                                        | 22%±4%              | N.M.                         |
| O15197                  | EPHB6       | RL <b>S</b> L <b>V</b> I <b>G</b> S <b>I</b> L <b>G</b> AL <b>A</b> FL <b>L</b> L <b>L</b> AA <b>I</b> TVL <b>A</b> V <b>V</b>                                       | RASLLLLLLLL <b>S</b> LL <b>L</b> G <b>S</b> LL <b>G</b> AL <b>I</b> L <b>I</b>                                        | 25%±3%              | -21.6±0.2                    |
| O15197                  | EPHB6_G12I  |                                                                                                                                                                      | RASLLLLLLLL <b>S</b> LL <b>L</b> I <b>S</b> LL <b>G</b> AL <b>I</b> L <b>I</b>                                        | 18%±5%              | N.M.                         |
| Q13586                  | STIM1       | LKDFML <b>V</b> V <b>S</b> IV <b>I</b> G <b>V</b> GG <b>C</b> W <b>F</b> A <b>I</b> Q <b>N</b> R <b>S</b>                                                            | RASLL <b>V</b> SLL <b>I</b> G <b>L</b> LG <b>C</b> LL <b>A</b> Y <b>L</b> L <b>I</b> L <b>I</b>                       | 24%±6%              | -20.4±0.4                    |
| Q13586                  | STIM1_G12I  |                                                                                                                                                                      | RASLL <b>V</b> SLL <b>I</b> G <b>L</b> L <b>I</b> C <b>L</b> L <b>A</b> Y <b>L</b> L <b>I</b> L <b>I</b>              | 27%±8%              | -20.2±1.9                    |
| B6SEH8                  | ERVV1       | KRAL <b>G</b> L <b>L</b> I <b>L</b> AG <b>M</b> GA <b>A</b> I <b>G</b> M <b>I</b> AAWGG <b>F</b> T <b>Y</b> H                                                        | RASLL <b>L</b> G <b>L</b> LL <b>L</b> AL <b>L</b> G <b>A</b> LL <b>G</b> M <b>L</b> L <b>I</b> L <b>I</b>             | 24%±8%              | -19.5±0.2                    |
| B6SEH8                  | ERVV1_G12I  |                                                                                                                                                                      | RASLL <b>L</b> G <b>L</b> LL <b>L</b> AL <b>L</b> I <b>A</b> LL <b>G</b> M <b>L</b> L <b>I</b> L <b>I</b>             | 22%±5%              | -9.2±0.4                     |
| Q8N3T1                  | GLT15       | HRACRL <b>Q</b> FL <b>L</b> LL <b>L</b> ML <b>G</b> CV <b>L</b> MM <b>V</b> AML <b>H</b> AA <b>H</b>                                                                 | RASLL <b>L</b> F <b>L</b> LL <b>L</b> LL <b>L</b> L <b>G</b> C <b>L</b> LL <b>M</b> ML <b>I</b> L <b>I</b>            | 19%±1%              | -18.1±0.4                    |
| Q8N3T1                  | GLT15_G12I  |                                                                                                                                                                      | RASLL <b>L</b> F <b>L</b> LL <b>L</b> LL <b>L</b> L <b>L</b> L <b>I</b> C <b>L</b> LL <b>M</b> ML <b>I</b> L <b>I</b> | 37%±7%              | N.M.                         |
| P05067                  | A4          | <b>S</b> N <b>K</b> G <b>A</b> I <b>I</b> G <b>L</b> M <b>V</b> G <b>G</b> V <b>V</b> I <b>A</b> T <b>V</b> I <b>V</b> I <b>T</b> L <b>V</b> M <b>L</b> K <b>K</b> K | RASLL <b>L</b> S <b>L</b> L <b>G</b> ALL <b>G</b> LL <b>L</b> G <b>G</b> L <b>I</b> L <b>I</b>                        | 18%±4%              | -35.2±0.1                    |
| P05067                  | A4_G12I     |                                                                                                                                                                      | RASLL <b>L</b> S <b>L</b> L <b>G</b> ALL <b>I</b> LL <b>L</b> G <b>G</b> L <b>I</b> L <b>I</b>                        | 16%±3%              | N.M.                         |
| Q96I36                  | COX14       | Y <b>K</b> T <b>F</b> S <b>T</b> S <b>M</b> LL <b>L</b> T <b>V</b> Y <b>G</b> G <b>Y</b> L <b>C</b> S <b>V</b> R <b>V</b> Y <b>H</b> Y <b>F</b> Q <b>W</b>           | RASLL <b>L</b> S <b>M</b> LL <b>L</b> T <b>L</b> L <b>G</b> LL <b>C</b> S <b>L</b> L <b>I</b> L <b>I</b>              | 14%±2%              | -21.1±0.1                    |
| Q96I36                  | COX14_G12I  |                                                                                                                                                                      | RASLL <b>L</b> S <b>M</b> LL <b>L</b> T <b>L</b> L <b>I</b> G <b>L</b> L <b>C</b> S <b>L</b> L <b>I</b> L <b>I</b>    | 27%±7%              | -5.1±0.7                     |

<sup>1</sup>Uniprot Accession

<sup>2</sup>Relative CAT activity, compared to GpA (average ± standard deviation)

<sup>3</sup>CATM energy of the poly-Leu construct (average ± standard deviation). N.M. = no model predicted.



Table S4. Constructs discarded because of TOXCAT signal >30% for the C1<sub>Gly→Ile</sub> variant

| Uniprot AC <sup>1</sup> | Name       | Wild-type Sequence                                                                                                                                                   | Poly-Leu Construct                                                                                 | TOXCAT <sup>2</sup> | CATM (kcal/mol) <sup>3</sup> |
|-------------------------|------------|----------------------------------------------------------------------------------------------------------------------------------------------------------------------|----------------------------------------------------------------------------------------------------|---------------------|------------------------------|
| P43489                  | TNR4       | GRAVAAI <b>L</b> GLGLVL <b>G</b> LLGALA <b>I</b> LLALY                                                                                                               | RASLLL <b>I</b> LLLGLLLGL <b>L</b> ALLILI                                                          | 102%±11%            | -39.7±0.1                    |
| P43489                  | TNR4_G12I  |                                                                                                                                                                      | RASLLL <b>I</b> LLLGLLL <b>I</b> LLLALLILI                                                         | 109%±13%            | N.M.                         |
| Q9UPZ6                  | THS7A      | K <b>T</b> WVY <b>G</b> VAA <b>G</b> A <b>F</b> VLLIFIVSMIYL <b>A</b> C                                                                                              | RASLLL <b>L</b> LLL <b>T</b> WLLGVLL <b>G</b> ALILI                                                | 87%±37%             | -3.2±0.1                     |
| Q9UPZ6                  | THS7A_G12I |                                                                                                                                                                      | RASLLL <b>L</b> LLL <b>T</b> WLL <b>I</b> VLL <b>G</b> ALILI                                       | 76%±9%              | N.M.                         |
| Q7L8C5                  | STY13      | SVAV <b>I</b> AL <b>G</b> AT <b>L</b> GT <b>A</b> TS <b>I</b> LALCGV <b>T</b> CLCRH                                                                                  | RASLLL <b>V</b> ILL <b>G</b> ALL <b>G</b> TLL <b>S</b> ILILI                                       | 79%±5%              | -31.0±0.1                    |
| Q7L8C5                  | STY13_G12I |                                                                                                                                                                      | RASLLL <b>V</b> ILL <b>G</b> ALL <b>I</b> TLL <b>S</b> ILILI                                       | 45%±6%              | N.M.                         |
| Q08ET2                  | SIG14      | LVL <b>T</b> L <b>I</b> R <b>G</b> AL <b>M</b> G <b>A</b> GFLLTYGLTWIYY <b>T</b> RC                                                                                  | RASLLL <b>T</b> LLL <b>G</b> ALL <b>G</b> ALL <b>L</b> LILI                                        | 77%±7%              | -26.3±0.1                    |
| Q08ET2                  | SIG14_G12I |                                                                                                                                                                      | RASLLL <b>T</b> LLL <b>G</b> ALL <b>I</b> ALL <b>L</b> LILI                                        | 39%±14%             | N.M.                         |
| Q8TDF5                  | NETO1      | S <b>G</b> T <b>V</b> I <b>G</b> V <b>T</b> S <b>C</b> I <b>V</b> I <b>L</b> I <b>I</b> I <b>I</b> S <b>V</b> I <b>V</b> Q <b>I</b> K <b>Q</b> A                     | RASLLL <b>L</b> LLL <b>G</b> TLL <b>G</b> VLL <b>C</b> ILILI                                       | 72%±5%              | -32.9±0.3                    |
| Q8TDF5                  | NETO1_G12I |                                                                                                                                                                      | RASLLL <b>L</b> LLL <b>G</b> TLL <b>I</b> VLL <b>C</b> ILILI                                       | 38%±%               | N.M.                         |
| Q99795                  | GPA33      | <b>M</b> N <b>V</b> AL <b>V</b> V <b>G</b> I <b>A</b> V <b>G</b> V <b>V</b> A <b>A</b> L <b>I</b> I <b>I</b> G <b>I</b> I <b>I</b> Y <b>C</b>                        | RASLLL <b>L</b> M <b>L</b> L <b>A</b> L <b>L</b> L <b>G</b> I <b>L</b> L <b>G</b> V <b>L</b> ILILI | 68%±17%             | -23.3±0.0                    |
| Q99795                  | GPA33_G12I |                                                                                                                                                                      | RASLLL <b>L</b> M <b>L</b> L <b>A</b> L <b>L</b> L <b>I</b> I <b>L</b> L <b>G</b> V <b>L</b> ILILI | 38%±7%              | N.M.                         |
| Q9BY71                  | LRRC3      | <b>T</b> T <b>D</b> V <b>A</b> M <b>L</b> V <b>T</b> M <b>F</b> G <b>W</b> F <b>A</b> M <b>V</b> I <b>A</b> V <b>V</b> V <b>V</b> Y <b>R</b> H                       | RASLLL <b>V</b> ALL <b>V</b> TLL <b>G</b> WLL <b>M</b> V <b>L</b> ILILI                            | 68%±10%             | -8.3±0.4                     |
| Q9BY71                  | LRRC3_G12I |                                                                                                                                                                      | RASLLL <b>V</b> ALL <b>V</b> TLL <b>I</b> WLL <b>M</b> V <b>L</b> ILILI                            | 57%±12%             | N.M.                         |
| Q30201                  | HFE        | <b>T</b> L <b>V</b> I <b>G</b> V <b>I</b> S <b>G</b> I <b>A</b> V <b>F</b> V <b>V</b> I <b>L</b> F <b>I</b> G <b>I</b> L <b>F</b> I <b>I</b> L <b>R</b> K <b>R</b> Q | RASLLL <b>T</b> LLL <b>G</b> VLL <b>G</b> I <b>L</b> L <b>F</b> V <b>L</b> ILILI                   | 64%±9%              | -23.3±0.2                    |
| Q30201                  | HFE-G12I   |                                                                                                                                                                      | RASLLL <b>T</b> LLL <b>G</b> VLL <b>I</b> I <b>L</b> L <b>F</b> V <b>L</b> ILILI                   | 53%±5%              | N.M.                         |
| Q5SSG8                  | MUC21      | A <b>W</b> E <b>I</b> F <b>L</b> I <b>T</b> L <b>V</b> S <b>V</b> V <b>A</b> A <b>V</b> G <b>L</b> F <b>A</b> G <b>L</b> F <b>F</b> C <b>V</b> R                     | RASLLL <b>V</b> ALL <b>G</b> LL <b>L</b> G <b>L</b> L <b>C</b> V <b>L</b> ILILI                    | 60%±6%              | -32.3±0.4                    |
| Q5SSG8                  | MUC21_G12I |                                                                                                                                                                      | RASLLL <b>V</b> ALL <b>G</b> LL <b>L</b> I <b>L</b> L <b>C</b> V <b>L</b> ILILI                    | 43%±%               | N.M.                         |
| Q9P2S2                  | NRXN2      | G <b>M</b> V <b>V</b> G <b>I</b> V <b>A</b> A <b>A</b> L <b>C</b> I <b>L</b> I <b>L</b> L <b>Y</b> A <b>M</b>                                                        | RASLLL <b>L</b> S <b>L</b> L <b>G</b> M <b>L</b> L <b>G</b> I <b>L</b> L <b>A</b> A <b>L</b> ILILI | 54%±2%              | -33.7±0.2                    |
| Q9P2S2                  | NRXN2_G12I |                                                                                                                                                                      | RASLLL <b>L</b> S <b>L</b> L <b>G</b> M <b>L</b> L <b>I</b> I <b>L</b> L <b>A</b> A <b>L</b> ILILI | 39%±8%              | N.M.                         |
| Q2M385                  | MPEG1      | S <b>G</b> <b>G</b> A <b>A</b> G <b>V</b> T <b>V</b> G <b>V</b> T <b>T</b> I <b>L</b> A <b>V</b> V <b>I</b> T <b>L</b> A <b>I</b> Y <b>G</b> T                       | RASLLL <b>L</b> LLL <b>G</b> ALL <b>G</b> VLL <b>G</b> V <b>L</b> ILILI                            | 34%±6%              | -33.9±0.9                    |
| Q2M385                  | MPEG1_G12I |                                                                                                                                                                      | RASLLL <b>L</b> LLL <b>G</b> ALL <b>I</b> VLL <b>G</b> V <b>L</b> ILILI                            | 33%±1%              | N.M.                         |
| Q8N967                  | LRTM2      | <b>M</b> G <b>T</b> V <b>I</b> I <b>A</b> G <b>V</b> V <b>C</b> G <b>V</b> V <b>C</b> I <b>M</b> M <b>V</b> V <b>A</b> A <b>A</b> Y <b>G</b> C <b>I</b>              | RASLLL <b>V</b> ILL <b>G</b> VLL <b>G</b> VLL <b>I</b> M <b>L</b> ILILI                            | 32%±5%              | -17.1±0.3                    |
| Q8N967                  | LRTM2_G12I |                                                                                                                                                                      | RASLLL <b>V</b> ILL <b>G</b> VLL <b>I</b> VLL <b>I</b> M <b>L</b> ILILI                            | 31%±13%             | N.M.                         |
| Q9H3N1                  | TMX1       | W <b>G</b> S <b>Y</b> T <b>V</b> F <b>A</b> L <b>A</b> T <b>L</b> F <b>S</b> G <b>L</b> L <b>L</b> G <b>L</b> C <b>M</b> I <b>F</b> V <b>A</b> D <b>C</b> L          | RASLLL <b>F</b> ALL <b>T</b> LL <b>L</b> G <b>L</b> L <b>L</b> G <b>L</b> L <b>L</b> ILILI         | 31%±3%              | -9.0±0.4                     |
| Q9H3N1                  | TMX1_G12I  |                                                                                                                                                                      | RASLLL <b>F</b> ALL <b>T</b> LL <b>L</b> I <b>L</b> L <b>L</b> G <b>L</b> L <b>L</b> ILILI         | 32%±5%              | N.M.                         |
| Q9H6B4                  | CLMP       | <b>M</b> V <b>A</b> G <b>A</b> V <b>T</b> G <b>I</b> V <b>A</b> G <b>A</b> L <b>L</b> I <b>F</b> L <b>L</b> V <b>L</b> L <b>I</b> R <b>R</b> K                       | RASLLL <b>L</b> M <b>L</b> L <b>G</b> ALL <b>G</b> I <b>L</b> L <b>G</b> ALILI                     | 30%±7%              | -33.8±0.1                    |
| Q9H6B4                  | CLMP_G12I  |                                                                                                                                                                      | RASLLL <b>L</b> M <b>L</b> L <b>G</b> ALL <b>I</b> I <b>L</b> L <b>G</b> ALILI                     | 33%±4%              | N.M.                         |

<sup>1</sup>Uniprot Accession

<sup>2</sup>Relative CAT activity, compared to GpA (average ± standard deviation)

<sup>3</sup>CATM energy of the poly-Leu construct (average ± standard deviation). N.M. = no model predicted.

**Table S5. Progression of number of constructs from the computational analysis to the final set of experimental constructs**

|                                                        |       |
|--------------------------------------------------------|-------|
| Human Single Pass Proteins in Uniprot                  | 2,383 |
| Wild-type with energy score below 0 kcal/mol           | 1,141 |
| Poly-Leu sequences with energy score below 0 kcal/mol  | 1,020 |
| Subset of sequences with non-polar interface           | 668   |
| Poly-Leu sequences with energy score below -5 kcal/mol | 604   |
| Sequences selected for experimental analysis           | 65    |
| Sequences that passed the maltose growth test (-15)    | 50    |
| Sequences with TOXCAT >30% (-10)                       | 40    |
| Sequences with C1 mutation <30% and final set (-14)    | 26    |

**Table S6. Uniprot Accession and description of the 26 final constructs applied for the analysis**

| <b>Uniprot Accession</b> | <b>Uniprot Entry Name</b> | <b>Protein Name</b>                                                     |
|--------------------------|---------------------------|-------------------------------------------------------------------------|
| A6NKW6                   | F159B_HUMAN               | Membrane protein FAM159B                                                |
| A6NL88                   | SHSA7_HUMAN               | Protein shisa-7                                                         |
| A8MWY0                   | K132L_HUMAN               | UPF0577 protein KIAA1324-like                                           |
| O60313                   | OPA1_HUMAN                | Dynamin-like 120 kDa protein, mitochondrial                             |
| O95210                   | STBD1_HUMAN               | Starch-binding domain-containing protein 1                              |
| P02724                   | GLPA_HUMAN                | Glycophorin-A                                                           |
| P10314                   | 1A32_HUMAN                | HLA class I histocompatibility antigen, A-32 alpha chain                |
| P16189                   | 1A31_HUMAN                | HLA class I histocompatibility antigen, A-31 alpha chain                |
| P17301                   | ITA2_HUMAN                | Integrin alpha-2                                                        |
| P17342                   | ANPRC_HUMAN               | Atrial natriuretic peptide receptor 3                                   |
| P20333                   | TNR1B_HUMAN               | Tumor necrosis factor receptor superfamily member 1B                    |
| P55289                   | CAD12_HUMAN               | Cadherin-12                                                             |
| P60602                   | ROMO1_HUMAN               | Reactive oxygen species modulator 1                                     |
| Q02505                   | MUC3A_HUMAN               | Mucin-3A                                                                |
| Q07820                   | MCL1_HUMAN                | Induced myeloid leukemia cell differentiation protein Mcl-1             |
| Q3V5L5                   | MGT5B_HUMAN               | Alpha-1,6-mannosylglycoprotein 6-beta-N-acetylglucosaminyltransferase B |
| Q96I36                   | COX14_HUMAN               | Cytochrome c oxidase assembly protein COX14                             |
| Q96PJ5                   | FCRL4_HUMAN               | Fc receptor-like protein 4                                              |
| Q9H3T3                   | SEM6B_HUMAN               | Semaphorin-6B                                                           |
| Q9NP84                   | TNR12_HUMAN               | Tumor necrosis factor receptor superfamily member 12A                   |
| Q9NY15                   | STAB1_HUMAN               | Stabilin-1                                                              |
| Q9UNN8                   | EPCR_HUMAN                | Endothelial protein C receptor                                          |
| Q9UNU6                   | CP8B1_HUMAN               | 7-alpha-hydroxycholest-4-en-3-one 12-alpha-hydroxylase                  |

**Table S7. Energetic and geometric properties of groups of CATM scores.**

| <b>CATM Score Range<sup>1</sup></b>                               | <b>-5 to -15</b> | <b>-15 to-25</b> | <b>-25 to -35</b> | <b>-35 to -45</b> | <b>-45 and below</b> |
|-------------------------------------------------------------------|------------------|------------------|-------------------|-------------------|----------------------|
| Number of models                                                  | 210              | 254              | 89                | 45                | 6                    |
| CATM energy score (kcal/mol)                                      | -10.1±3.0        | -19.5±2.7        | -29.4±3.1         | -39.0±2.9         | -47.6±4.0            |
| Van der Waals (kcal/mol)                                          | -24.2±4.2        | -29.9±3.7        | -35.2±3.2         | -39.7±3.7         | -39.9±5.3            |
| C $\alpha$ -H hydrogen bonding (kcal/mol)                         | -3.4±4.9         | -4.9±3.9         | -7.6±3.2          | -10.0±2.9         | -13.2±0.8            |
| Solvation (kcal/mol)                                              | 18.2±2.1         | 16.1±2.5         | 14.1±2.1          | 11.1±2.8          | 5.5±1.1              |
| Crossing angle (°)                                                | -52.3±8.1        | -49.2±8.1        | -47.3±4.4         | -40.4±5.5         | -31.6±2.1            |
| Number of C $\alpha$ -H bonds                                     | 4.7±1.0          | 4.3±0.9          | 5.6±1.3           | 7.3±1.1           | 8.0±0.0              |
| Interface surface area (Å <sup>2</sup> )                          | 4730±910         | 4790±910         | 4730±710          | 4400±580          | 4070±490             |
| Inter-helical distance (Å)                                        | 7.1±0.2          | 7.0±0.2          | 6.6±0.3           | 6.4±0.1           | 6.4±0.1              |
| Van der Waals/Interface surface area (kcal/(mol Å <sup>2</sup> )) | -0.0051±0.0013   | -0.0063±0.0014   | -0.0076±0.0013    | -0.0091±0.0010    | -0.0098±0.0006       |
| Sequences with GxxxG                                              | 17%              | 28%              | 75%               | 100%              | 100%                 |
| Sequences with Sm-xxx-Sm                                          | 93%              | 96%              | 100%              | 100%              | 100%                 |
| Sequences with Gly at N1                                          | 2%               | 13%              | 67%               | 100%              | 100%                 |
| Sequences with Gly at C1                                          | 99%              | 97%              | 100%              | 98%               | 100%                 |
| Sequences with Gly at C5                                          | 17%              | 14%              | 16%               | 36%               | 50%                  |

<sup>1</sup>All values are reported as averages  $\pm$  standard deviation.

<sup>2</sup>Sm-xxx-Sm are defined by any combinations of Gly, Ala, Ser and Cys at the first and last position.
